# Supplementary material
Source: ML conference proceedings conference paper supplement (https://proceedings.neurips.cc/paper_files/paper/2022/hash/3322a9a72a1707de14badd5e552ff466-Abstract.html)
Supplement: Supplementary file 1 [file 3322a9a72a1707de14badd5e552ff466-Supplemental-Conference.zip]

Archive with 8 entries (7 files):
- Supplementary_materials/
- __MACOSX/._Supplementary_materials
- Supplementary_materials/.DS_Store
- __MACOSX/Supplementary_materials/._.DS_Store
- Supplementary_materials/Appendix+Checklist.pdf
- __MACOSX/Supplementary_materials/._Appendix+Checklist.pdf
- Supplementary_materials/code.zip
- __MACOSX/Supplementary_materials/._code.zip
